# Supplementary material for: Platelet Phenotyping and Function Testing in Thrombocytopenia
Source: MDPI journal article supplement (doi:10.3390/jcm10051114), 2021-03-07
Supplement: s1 [file s1]

# Supplementary material:

**Table S1.** Thrombocytopenia-causing genes associated with platelet function defects [18–23].

| Mutational effects                            | Gene           | Gene location                    | Protein name                                       | Inheritance | Disease                                                                                                              | Degree of thrombocytopenia | Platelet size | Platelet function defects                                                                                                               | Degree of bleeding                                                                                                                           |
|-----------------------------------------------|----------------|----------------------------------|----------------------------------------------------|-------------|----------------------------------------------------------------------------------------------------------------------|----------------------------|---------------|-----------------------------------------------------------------------------------------------------------------------------------------|----------------------------------------------------------------------------------------------------------------------------------------------|
| Megakaryopoiesis                              | <i>ETV6</i>    | 12p13.2                          | Transcription factor ETV6                          | AD          | <i>ETV6</i> -related thrombocytopenia                                                                                | + / ++                     | N/L           | reduced ability to spread on fibrinogen                                                                                                 | mild                                                                                                                                         |
|                                               | <i>FLI1</i>    | 11q24.3                          | Friend leukemia integration 1 transcription factor | AR          | Paris-Trousseau thrombocytopenia/Jacobsen syndrome                                                                   | ++                         | N/L           | defect in platelet GPVI, GPIb/IX, GPIIb, abnormal $\alpha$ -granules, $\delta$ -SPD, with reduced ability of platelets to aggregate     | moderate                                                                                                                                     |
|                                               | <i>GATA1</i>   | Xp11.23                          | Erythroid transcription factor                     | XL          | <i>GATA1</i> -related disease: X-linked thrombocytopenia (XLT) and X-linked thrombocytopenia with thalassemia (XLTT) | +++                        | N/L           | less $\alpha$ -granules or $\alpha$ -/ $\delta$ -SPD                                                                                    | moderate to severe                                                                                                                           |
|                                               | <i>GPIIB</i>   | 9q34.13                          | Zinc finger protein Gfi-1b                         | AD          | <i>GPIIb</i> -related thrombocytopenia, Gray Platelet-like syndrome                                                  | + / ++                     | L             | decreased or absent $\alpha$ -granules, $\alpha$ -/ $\delta$ -SPD                                                                       | moderate to severe                                                                                                                           |
|                                               | <i>NBEAL2</i>  | 3p21.31                          | Neurobeachin-like protein 2                        | AR          | Gray platelet syndrome                                                                                               | ++ / +++                   | L             | decrease or absence of platelet $\alpha$ -granules                                                                                      | mild to severe                                                                                                                               |
|                                               | Deletions      | 11q23-24 (encoding <i>FLI1</i> ) | friend leukemia integration                        | AD          | Paris-Trousseau thrombocytopenia, Jacobsen syndrome                                                                  | +++                        | N/L           | abnormal giant $\alpha$ -granules in platelets, $\delta$ -SPD                                                                           | moderate to severe                                                                                                                           |
|                                               | <i>ANKRD26</i> | 10p12                            | Ankyrin repeat domain-containing protein 26        | AD          | <i>ANKRD26</i> -related thrombocytopenia                                                                             | ++ / +++                   | N             | reduced $\alpha$ -granules in some patients                                                                                             | mild                                                                                                                                         |
|                                               | <i>RUNX1</i>   | 21q22.12                         | Runt-related transcription factor 1                | AD          | Familial platelet disorder with propensity to acute myelogenous leukemia (FPD/AML)                                   | ++                         | N/L           | defects of $\alpha$ IIb $\beta$ 3 activation and platelet aggregation and $\alpha$ -/ $\delta$ -SPD                                     | moderate                                                                                                                                     |
|                                               | <i>SLFN14</i>  | 17q12                            | Protein SLFN14                                     | AD          | <i>SLFN14</i> -related thrombocytopenia                                                                              | + / ++                     | L             | reduced number of $\delta$ -granules and defective platelet aggregation and decreased ATP secretion have been reported                  | moderate to severe                                                                                                                           |
|                                               | <i>SRC</i>     | 20q11.23                         | Proto-oncogene tyrosine-protein kinase Src         | AD          | <i>SRC</i> -related thrombocytopenia                                                                                 | ++                         | L             | deficiency of platelet $\alpha$ -granules and abundant vacuoles                                                                         | severe                                                                                                                                       |
|                                               | <i>ABCG5</i>   | 2p21                             | ATP-binding cassette sub-family G member 5         | AR          | Sitosterolemia with macrothrombocytopenia                                                                            | + / ++                     | L             | hypertrophic and hyperplastic dysfunctional platelets due to accumulation of plant sterols in platelet membranes                        | mild to moderate                                                                                                                             |
|                                               | <i>ABCG8</i>   | 2p22                             | ATP-binding cassette sub-family G member 8         | AR          | Sitosterolemia with macrothrombocytopenia                                                                            | + / ++                     | L             | hypertrophic and hyperplastic dysfunctional platelets due to accumulation of plant sterols in platelet membranes                        | mild to moderate                                                                                                                             |
|                                               | <i>PTPRJ</i>   | 11p11.2                          | Receptor-type tyrosine-protein phosphatase eta     | AR          | Inherited thrombocytopenia                                                                                           | ++ / +++                   | S             | impaired platelet function due to decreases GPVI expression has been hypothesized                                                       | mild                                                                                                                                         |
|                                               | <i>RBM8A</i>   | 1q21                             | RNA-binding protein 8A                             | AR          | Thrombocytopenia-absent radius syndrome                                                                              | +                          | S/N           | decreased numbers of $\delta$ -granules                                                                                                 | moderate to severe                                                                                                                           |
|                                               | <i>PTPN11</i>  | 12q24.13                         | Tyrosine-protein phosphatase non-receptor type 11  | AD          | Noonan syndrome                                                                                                      | ++                         | L             | encodes SHP2 which a critical regulator of signal transduction                                                                          | moderate to severe                                                                                                                           |
|                                               | <i>GALE</i>    | 1p36.11                          | UDP-glucose 4-epimerase                            | AR          | Inherited thrombocytopenia                                                                                           | +++                        | N/L           | pale platelets                                                                                                                          | mild                                                                                                                                         |
| Platelet production and/or platelet clearance | <i>RAB27A</i>  | 15q21.3                          | Ras-related protein Rab-27A                        | AR          | Griscelli syndrome, type 2; GS2                                                                                      | +                          | N             | reduced platelet aggregation, decreased numbers of $\delta$ -granules                                                                   | mild                                                                                                                                         |
|                                               | <i>VIPAS39</i> | 14q24.3                          | Spermatogenesis-defective protein 39 homolog       | AR          | Arthrogryposis, renal dysfunction, and cholestasis 2                                                                 | +                          | N/L           | leads to significant $\alpha$ -granule deficiencies in platelets and P-selectin is severely decreased.                                  | our knowledge of the clinical consequences of the platelet defects is limited due to children with ARC mostly die in the first years of life |
|                                               | <i>PLAU</i>    | 10q22.2                          | Urokinase-type plasminogen activator (u-PA)        | AD          | Quebec syndrome                                                                                                      | ++                         | N             | increased u-PA levels within platelets lead to intraplatelet plasmin generation and secondary degradation of $\alpha$ -granule proteins | moderate to severe                                                                                                                           |

|               |                 |                                                                             |    |                                                           |        |     |                                                                                                                                                                                                                                                                                                      |                    |
|---------------|-----------------|-----------------------------------------------------------------------------|----|-----------------------------------------------------------|--------|-----|------------------------------------------------------------------------------------------------------------------------------------------------------------------------------------------------------------------------------------------------------------------------------------------------------|--------------------|
| <i>GP1BA</i>  | 17p13.2         | Platelet glycoprotein Ib alpha chain                                        | AR | biallelic Bernard-Soulier syndrome (BSS)                  | ++/+++ | N/L | absence or dysfunction of the platelet glycoprotein receptor Ib/V/IX complex and reduced agglutination/aggregation response to ristocetin, reduced adhesion to VWF/collagen                                                                                                                          | moderate to severe |
| <i>GP1BA</i>  | 17p13.3         | Platelet glycoprotein Ib alpha chain                                        | AD | monoallelic Bernard-Soulier syndrome (BSS)                | + / ++ | L   | BSS caused by absence or dysfunction of the platelet glycoprotein receptor Ib/V/IX complex with absent or markedly reduced aggregation in response to ristocetin                                                                                                                                     | mild               |
| <i>GP1BA</i>  | 17p13.3         | Platelet glycoprotein Ib alpha chain                                        | AD | platelet type von-Willebrand disease (PT-VWD)             | ++/+++ | N/L | spontaneous platelet aggregation in vitro                                                                                                                                                                                                                                                            | Moderate to severe |
| <i>FLNA</i>   | Xq28            | Filamin-A                                                                   | XL | Filaminopathies A                                         | ++     | L   | abnormal platelet morphology, heterogeneous distribution of $\alpha$ -granules                                                                                                                                                                                                                       | Moderate           |
| <i>GPIBB</i>  | 22q11           | Platelet glycoprotein Ib beta chain                                         | AD | Bernard–Soulier syndrome                                  | ++/+++ | L   | absence or dysfunction of the platelet glycoprotein receptor Ib/V/IX complex and reduced agglutination/aggregation response to ristocetin, reduced adhesion to VWF/collagen                                                                                                                          | moderate to severe |
| <i>GP9</i>    | 3q21.3          | Platelet glycoprotein IX                                                    | AD | Bernard–Soulier syndrome, monoallelic (type C)            | +      | L   | absence or dysfunction of the platelet glycoprotein receptor Ib/V/IX complex and reduced agglutination/aggregation response to ristocetin, reduced adhesion to VWF/collagen                                                                                                                          | mild               |
| <i>ITGA2B</i> | 17q21           | Integrin alpha-IIb                                                          | AD | ITGA2B/ITGB3-related thrombocytopenia                     | + / ++ | N   | mild aggregation defects                                                                                                                                                                                                                                                                             | mild to moderate   |
| <i>ITGB3</i>  | 17q21           | Integrin beta-3                                                             | AD | ITGA2B/ITGB3-related thrombocytopenia                     | + / ++ | N   | mild aggregation defects                                                                                                                                                                                                                                                                             | mild to moderate   |
| <i>MYH9</i>   | 22q12.3         | Myosin-9                                                                    | AD | <i>MYH9</i> -related disease (MYH9-RD)                    | + / ++ | L/G | case report [23]granule release defect and impaired thrombin generation detected for patient with May-Hegglin anomaly (pathogenic <i>MYH9</i> variant E1841K)                                                                                                                                        | mild to severe     |
| <i>PRKACG</i> | 9q21.11         | cAMP-dependent protein kinase catalytic subunit gamma                       | AR | <i>PRKACG</i> -related thrombocytopenia                   | +++    | L/G | encodes the gamma isoform of the catalytic subunit of PKA, therefore its mutation causes a defect in platelet activation                                                                                                                                                                             | severe             |
| <i>TRPM7</i>  | 15q21.2         | Transient receptor potential cation channel subfamily M member 7            | AD | <i>TRPM7</i> -related thrombocytopenia                    | ++     | L   | abberant distribution of granules, increased number and anarchic organization of microtubules                                                                                                                                                                                                        | mild               |
| <i>TPM4</i>   | 19p13.12-p13.11 | Tropomyosin alpha-4 chain                                                   | AD | Tropomyosin 4-related thrombocytopenia                    | +      | L   | mild effect on platelet function                                                                                                                                                                                                                                                                     | mild               |
| <i>STIM1</i>  | 11p15.4         | Stromal interaction molecule 1                                              | AD | Stormorken syndrome                                       | + / ++ | N/L | platelet dysfunction and reduced aggregation to ADP and collagen, increased intracellular $Ca^{2+}$ levels, activated integrin $\alpha$ IIb $\beta$ 3, increased PS exposure, impaired $\alpha$ -granule release and clot retraction (impaired integrin $\alpha$ IIb $\beta$ 3 outside-in signaling) | mild to severe     |
| <i>GNE</i>    | 9p13.3          | Bifunctional UDP-N-acetylglucosamine 2-epimerase/N-acetylmannosamine kinase | AR | <i>GNE</i> myopathy with congenital thrombocytopenia      | +      | N   | defect in GPIb/IX receptors and changes in surface sialylation                                                                                                                                                                                                                                       | mild               |
| <i>FYB</i>    | 5p13.1          | FYN-binding protein 1                                                       | AR | <i>FYB</i> -related thrombocytopenia                      | ++/+++ | S/N | platelets showed reduced pseudopodium formation, increased level of activated platelets                                                                                                                                                                                                              | mild to moderate   |
| <i>WAS</i>    | Xp11.23         | Wiskott-Aldrich syndrome protein                                            | XL | Wiskott-Aldrich syndrome, X-linked thrombocytopenia (XLT) | +++    | S/N | decreased aggregation and secretion, decreased numbers of $\delta$ -granules, impaired clot retraction (defect in integrin $\alpha$ IIb $\beta$ 3 outside-in signaling)                                                                                                                              | severe             |

Degree of thrombocytopenia: +,  $>100$ – $<150 \times 10^9$  platelets/L; ++,  $50$ – $100 \times 10^9$  platelets/L; +++,  $<50 \times 10^9$  platelets/L. Inheritance: AR; autosomal recessive, AD; autosomal dominant, XL; X-linked. Platelet size: S; small, N; normal, L; large, G; giant; SPD: storage pool deficiency. Website: [www.omim.org](http://www.omim.org); [www.orpha.net](http://www.orpha.net); [www.omim.org](http://www.omim.org); [www.isth.org](http://www.isth.org); [www.malacards.org](http://www.malacards.org); [www.uniprot.org](http://www.uniprot.org).

**Table S2.** Impact of thrombocytopenia on selected point-of-care-related and specialized platelet function tests [40,89].

| Type                                          | Method                                                                       | Sample  | Method principle                                                                                                                                                                                                           | Platelet dysfunction sensitivity                                                                                 | Impact of thrombocytopenia                                                                                                              |
|-----------------------------------------------|------------------------------------------------------------------------------|---------|----------------------------------------------------------------------------------------------------------------------------------------------------------------------------------------------------------------------------|------------------------------------------------------------------------------------------------------------------|-----------------------------------------------------------------------------------------------------------------------------------------|
| Point-of-care-related platelet function tests | Multiple Electrode Aggregometry (MEA, Multiplate® Analyzer)                  | WB      | impedance-based detection of electrode coating by aggregated platelets over time                                                                                                                                           | monitoring anti-platelet therapy response                                                                        | sensitive to thrombocytopenia, control samples with adjusted platelet count/mass recommended, not recommended for routine practice      |
|                                               | Platelet Function Analyzer (PFA-100®, INNOVANCE® PFA-200)                    | WB      | occlusion of an aperture coated with collagen/epinephrine or collagen/ADP at high arterial shear rate                                                                                                                      | only severe platelet defects (e.g., BSS)                                                                         | not recommended for platelet count < 100 × 10 <sup>9</sup> /L                                                                           |
|                                               | Cone and Plate(let) Analyzer (CPA, Impact-R™)                                | WB      | shear-induced platelet adhesion/aggregation VWF-immobilized polystyrene surface                                                                                                                                            | moderate-severe hypo and hyperreactive platelets                                                                 | sensitive to thrombocytopenia, control samples with adjusted platelet count/mass recommended                                            |
|                                               | Thromboelastography (TEG® – Platelet Mapping™)/Thromboelastometry (ROTEM®)   | WB      | viscoelastic-based detection of clot strength                                                                                                                                                                              | limited studies for platelet-dependent coagulation defects                                                       | sensitive to thrombocytopenia, control samples with adjusted platelet count/mass recommended                                            |
| Specialized platelet function tests           | Light Transmission Aggregometry (LTA)                                        | PRP     | Photo-optical measurement of light transmission increase in relation to agonist-induced platelet aggregation/agglutination                                                                                                 | limited sensitivity to $\delta$ -SPD or primary secretion defects                                                | not recommended for platelet count $\leq 100 \times 10^9$ /L in PRP, control samples with adjusted platelet count/mass recommended      |
|                                               | Lumi-Aggregometry (Chrono-Log®)                                              | PRP     | bioluminescent detection of released ATP during agonist-induced platelet aggregation                                                                                                                                       | detection of storage pool and secretion defects of $\delta$ -granules but no discrimination                      | not recommended for platelet count $\leq 100 \times 10^9$ /L in PRP, control samples with adjusted platelet count/mass recommended      |
|                                               | Flow cytometry-based tests                                                   | WB, PRP | laser-based detection of fluorescently- labelled singular platelets                                                                                                                                                        | detection of a panel of platelet activation and signaling markers ex vivo and in response to agonists (Figure 2) | recommended technique for mild, moderate and severe thrombocytopenia, potentially sensitive for platelet count $\leq 10 \times 10^9$ /L |
|                                               | Thrombin Generation Assay (TGA) / Calibrated Automated Thrombinography (CAT) | PRP     | fluorescence-based kinetic assay of thrombin-mediated substrate cleavage triggered by active tissue factor                                                                                                                 | sensitive for intrinsic platelet-dependent coagulation defects and moderate-severe platelet dysfunction          | not recommended for platelet count < 50 × 10 <sup>9</sup> /L in PRP, control samples with adjusted platelet count/mass recommended      |
|                                               | Microfluidics                                                                | WB      | light/fluorescence microscopy-based simultaneous multi-parameter assessment of shear-dependent platelet adhesion, aggregation, coagulation and thrombus formation on extracellular matrix proteins or on endothelial cells | Systems biology approach for the analysis of platelet dysfunction                                                | sensitive to thrombocytopenia, control samples with adjusted platelet count/mass recommended                                            |

WB; whole blood, PRP; platelet-rich plasma, ADP; adenosine diphosphate, BSS; Bernard-Soulier syndrome, SPD; storage pool deficiency, VWF; von Willebrand factor, ATP; adenosine triphosphate, PFA; platelet function analyzer, CPA; cone and platelet analyzer, MEA; multiple electrode aggregometry, TEG; thromboelastography, ROTEM; rotational thromboelastometry, TGA; thrombin generation assay, CAT; calibrated automated thrombinography.
